# Supplementary material for: Nitrogen as a pnicogen?: evidence for π-hole driven novel pnicogen bonding interactions in nitromethane–ammonia aggregates using matrix isolation infrared spectroscopy and ab initio computations
Source: Royal Society of Chemistry journal article supplement (doi:10.1039/d0cp06273a), 2021-01-01
Supplement: d0cp06273a1.pdf [file d0cp06273a1.pdf]

## **Electronic Supplementary Information**

**Nitrogen as a pnicogen?: Evidence for  $\pi$ -hole driven novel pnicogen bonding interactions in nitromethane-ammonia aggregates using matrix isolation infrared spectroscopy and ab initio computations**

**Swaroop Chandra, B. Suryaprasad, N. Ramanathan\* and K. Sundararajan**

Homi Bhabha National Institute, Materials Chemistry & Metal Fuel Cycle Group,  
Indira Gandhi Center for Atomic Research, Kalpakkam – 603102, Tamil Nadu, India

**S1** Computed shifts associated with selected modes of vibration from harmonic frequency calculations using various functionals.

**Table S1.** Computed wavenumbers associated with selected modes of vibration of NH<sub>3</sub> and NMeth submolecules, within heterodimers NAM I and NAM II, at CCSD level of theory with aug-cc-pVDZ basis set.

| CCSD/aug-cc-pVDZ                                                | Computed Wavenumber (Shift) cm <sup>-1</sup> | Intensity(km mol <sup>-1</sup> ) |
|-----------------------------------------------------------------|----------------------------------------------|----------------------------------|
| <b>NH<sub>3</sub></b>                                           |                                              |                                  |
| N-H bend (ν <sub>2</sub> )                                      | 1069.6                                       | 125                              |
| <b>NM</b>                                                       |                                              |                                  |
| C-N stretch (ν <sub>13</sub> ) <sup>[1,2]</sup>                 | 1477.3                                       | 57                               |
| O=N=O stretch (ν <sub>7</sub> ) <sup>[1,2]</sup>                | 1667.9                                       | 378                              |
| <b>NM – AM I   ΔE<sup>a</sup> = 0 kcal mol<sup>-1</sup></b>     |                                              |                                  |
| N-H bend                                                        | 1122.2 (+52.6)                               | 139                              |
| C-N stretch                                                     | 1484.7(+7.4)                                 | 37                               |
| O=N=O stretch                                                   | 1666.4 (-1.5)                                | 296                              |
| <b>NM – AM II   ΔE<sup>a</sup> = 1.77 kcal mol<sup>-1</sup></b> |                                              |                                  |
| N-H bend                                                        | 1116.7 (+47.1)                               | 138                              |
| C-N stretch                                                     | 1480.8 (+3.5)                                | 47                               |
| O=N=O stretch                                                   | 1657.0 (-10.9)                               | 371                              |

<sup>a</sup>Inclusive of ZPE corrections

**Table S2.** Computed wavenumbers associated with selected modes of vibration of NH<sub>3</sub> and NMeth submolecules, within heterodimers NAM I, NAM II and NAM\*, at MP2 level of theory with aug-cc-pVDZ basis set.

| MP2/aug-cc-pVDZ                                  | Computed Wavenumber (Shift) cm <sup>-1</sup> | Intensity(km mol <sup>-1</sup> ) |
|--------------------------------------------------|----------------------------------------------|----------------------------------|
| <b>NH<sub>3</sub></b>                            |                                              |                                  |
| N-H bend (ν <sub>2</sub> )                       | 1042.8                                       | 132                              |
| <b>NM</b>                                        |                                              |                                  |
| C-N stretch (ν <sub>13</sub> ) <sup>[1,2]</sup>  | 1420.6                                       | 36                               |
| O=N=O stretch (ν <sub>7</sub> ) <sup>[1,2]</sup> | 1760.5                                       | 156                              |
| <b>NM – AM I</b>                                 |                                              |                                  |
| N-H bend                                         | 1100.8 (+58.0)                               | 144                              |
| C-N stretch                                      | 1429.9 (+9.3)                                | 37                               |
| O=N=O stretch                                    | 1756.1 (-4.4)                                | 136                              |
| <b>NM – AM*</b>                                  |                                              |                                  |
| N-H bend                                         | 1098.3 (+55.5)                               | 147                              |
| C-N stretch                                      | 1431.8 (+11.2)                               | 37                               |
| O=N=O stretch                                    | 1758.0 (-2.5)                                | 135                              |
| <b>NM – AM II</b>                                |                                              |                                  |
| N-H bend                                         | 1094.4 (+51.6)                               | 144                              |
| C-N stretch                                      | 1425.2 (+4.6)                                | 40                               |
| O=N=O stretch                                    | 1751.0 (-9.5)                                | 166                              |

**Table S3.** Computed wavenumbers associated with selected modes of vibration of NH<sub>3</sub> and NMeth submolecules, within heterodimers NAM I and NAM II, at MP4 level of theory with aug-cc-pVDZ basis set.

| MP4/aug-cc-pVDZ                                                          | Computed Wavenumber (Shift) cm <sup>-1</sup> |
|--------------------------------------------------------------------------|----------------------------------------------|
| <b>NH<sub>3</sub></b>                                                    |                                              |
| N-H bend ( $\nu_2$ )                                                     | 1068.5                                       |
| <b>NM</b>                                                                |                                              |
| C-N stretch ( $\nu_{13}$ ) <sup>[1,2]</sup>                              | 1363.2                                       |
| O=N=O stretch ( $\nu_7$ ) <sup>[1,2]</sup>                               | 1615.4                                       |
| <b>NM – AM I   <math>\Delta E^a = 0</math> kcal mol<sup>-1</sup></b>     |                                              |
| N-H bend                                                                 | 1120.4(+51.9)                                |
| C-N stretch                                                              | 1370.7 (+7.5)                                |
| O=N=O stretch                                                            | 1609.8 (-5.6)                                |
| <b>NM – AM II   <math>\Delta E^a = 2.12</math> kcal mol<sup>-1</sup></b> |                                              |
| N-H bend                                                                 | 1113.2 (+44.7)                               |
| C-N stretch                                                              | 1363.0 (-0.2)                                |
| O=N=O stretch                                                            | 1607.4 (-8.0)                                |

<sup>a</sup>Inclusive of ZPE corrections

**Table S4.** Computed wavenumbers associated with selected modes of vibration of NH<sub>3</sub> and NMeth submolecules, within heterodimers NAM I, NAM II and NAM\*, at B3LYP-GD3 level of theory with aug-cc-pVDZ basis set.

| B3LYP/aug-cc-pVDZ                                                        | Computed Wavenumber (Shift) cm <sup>-1</sup> | Intensity(km mol <sup>-1</sup> ) |
|--------------------------------------------------------------------------|----------------------------------------------|----------------------------------|
| <b>NH<sub>3</sub></b>                                                    |                                              |                                  |
| N-H bend ( $\nu_2$ )                                                     | 1019.7                                       | 134                              |
| <b>NM</b>                                                                |                                              |                                  |
| C-N stretch ( $\nu_{13}$ ) <sup>[1,2]</sup>                              | 1431.9                                       | 64                               |
| O=N=O stretch ( $\nu_7$ ) <sup>[1,2]</sup>                               | 1631.8                                       | 331                              |
| <b>NM – AM I   <math>\Delta E^a = 0</math> kcal mol<sup>-1</sup></b>     |                                              |                                  |
| N-H bend                                                                 | 1072.1(+52.4)                                | 146                              |
| C-N stretch                                                              | 1437.1 (+5.2)                                | 305                              |
| O=N=O stretch                                                            | 1616.6 (-15.2)                               | 53                               |
| <b>NM – AM*   <math>\Delta E^a = 0.57</math> kcal mol<sup>-1</sup></b>   |                                              |                                  |
| N-H bend                                                                 | 1068.6 (+48.9)                               | 149                              |
| C-N stretch                                                              | 1439.2 (+7.3)                                | 56                               |
| O=N=O stretch                                                            | 1616.6 (-15.2)                               | 308                              |
| <b>NM – AM II   <math>\Delta E^a = 1.91</math> kcal mol<sup>-1</sup></b> |                                              |                                  |
| N-H bend                                                                 | 1068.7 (+49.0)                               | 149                              |
| C-N stretch                                                              | 1435.1 (+3.2)                                | 48                               |
| O=N=O stretch                                                            | 1623.4 (-8.4)                                | 331                              |

<sup>a</sup>Inclusive of ZPE corrections

**Table S5.** Computed wavenumbers associated with selected modes of vibration of NH<sub>3</sub> and NMeth submolecules, within heterodimers NAM I, NAM II and NAM\*, at B2PLYP level of theory with aug-cc-pVDZ basis set.

| B2PLYP/aug-cc-pVDZ                                              | Computed Wavenumber (Shift) cm <sup>-1</sup> | Intensity(km mol <sup>-1</sup> ) |
|-----------------------------------------------------------------|----------------------------------------------|----------------------------------|
| <b>NH<sub>3</sub></b>                                           |                                              |                                  |
| <b>N-H bend (ν<sub>2</sub>)</b>                                 | 1034.2                                       | 134                              |
| <b>NM</b>                                                       |                                              |                                  |
| <b>C-N stretch (ν<sub>13</sub>)<sup>[1,2]</sup></b>             | 1395.6                                       | 50                               |
| <b>O=N=O stretch (ν<sub>7</sub>)<sup>[1,2]</sup></b>            | 1616.3                                       | 256                              |
| <b>NM – AM I   ΔE<sup>a</sup> = 0 kcal mol<sup>-1</sup></b>     |                                              |                                  |
| <b>N-H bend</b>                                                 | 1092.0 (57.8)                                | 145                              |
| <b>C-N stretch</b>                                              | 1418.5 (22.9)                                | 34                               |
| <b>O=N=O stretch</b>                                            | 1607.2 (-9.1)                                | 259                              |
| <b>NM – AM*   ΔE<sup>a</sup> = 0.45 kcal mol<sup>-1</sup></b>   |                                              |                                  |
| <b>N-H bend</b>                                                 | 1087.9 (+53.7)                               | 149                              |
| <b>C-N stretch</b>                                              | 1400.8 (+5.2)                                | 35                               |
| <b>O=N=O stretch</b>                                            | 1607.6 (-8.7)                                | 263                              |
| <b>NM – AM II   ΔE<sup>a</sup> = 1.91 kcal mol<sup>-1</sup></b> |                                              |                                  |
| <b>N-H bend</b>                                                 | 1095.6 (+61.4)                               | 145                              |
| <b>C-N stretch</b>                                              | 1414.0 (+18.4)                               | 47                               |
| <b>O=N=O stretch</b>                                            | 1607.0 (-9.3)                                | 261                              |

<sup>a</sup>Inclusive of ZPE corrections

**S2** Coordinates and images of optimized geometries obtained at various levels of theory.

Coordinates of 1:1::NM:AM geometries at MP2/aug-cc-pVDZ

NM-AM I

|   |              |              |              |
|---|--------------|--------------|--------------|
| 7 | -2.210260000 | -0.201459000 | 0.000429000  |
| 1 | -3.192779000 | -0.475578000 | 0.000086000  |
| 1 | -2.082150000 | 0.401686000  | -0.813856000 |
| 1 | -2.082872000 | 0.402599000  | 0.814145000  |
| 6 | 0.907672000  | -1.278831000 | 0.000261000  |
| 1 | 1.451657000  | -1.542924000 | -0.912554000 |
| 1 | 1.452137000  | -1.542280000 | 0.912970000  |
| 1 | -0.105032000 | -1.703701000 | 0.000671000  |
| 7 | 0.706117000  | 0.197387000  | -0.000157000 |
| 8 | 0.602088000  | 0.759710000  | -1.098817000 |
| 8 | 0.603164000  | 0.760500000  | 1.098201000  |

NM-AM II

|   |              |              |              |
|---|--------------|--------------|--------------|
| 7 | 3.402574000  | 0.001224000  | 0.009561000  |
| 1 | 3.800535000  | 0.716887000  | 0.618924000  |
| 1 | 3.804341000  | 0.168469000  | -0.913729000 |
| 1 | 3.796880000  | -0.885005000 | 0.327391000  |
| 6 | 0.226781000  | 0.013898000  | -0.028765000 |
| 1 | 0.562973000  | -0.794611000 | -0.684595000 |
| 1 | 0.556317000  | 0.998200000  | -0.371108000 |
| 1 | 0.566018000  | -0.174833000 | 0.996622000  |
| 7 | -1.266734000 | 0.000370000  | -0.009290000 |
| 8 | -1.821145000 | -1.107291000 | 0.012066000  |
| 8 | -1.853683000 | 1.091835000  | 0.012582000  |

NM-AM\*

|   |              |              |              |
|---|--------------|--------------|--------------|
| 7 | 2.178375000  | 0.167723000  | -0.001499000 |
| 1 | 3.152856000  | 0.470038000  | 0.009384000  |
| 1 | 2.077634000  | -0.435963000 | -0.819339000 |
| 1 | 2.061517000  | -0.443173000 | 0.808838000  |
| 6 | -0.845273000 | 1.295391000  | -0.000448000 |
| 1 | -0.372807000 | 1.680672000  | 0.907379000  |
| 1 | -0.373576000 | 1.679395000  | -0.909216000 |
| 1 | -1.926456000 | 1.489814000  | -0.000160000 |
| 7 | -0.678037000 | -0.185604000 | 0.000449000  |
| 8 | -0.626153000 | -0.754658000 | 1.099112000  |
| 8 | -0.630085000 | -0.756338000 | -1.097469000 |

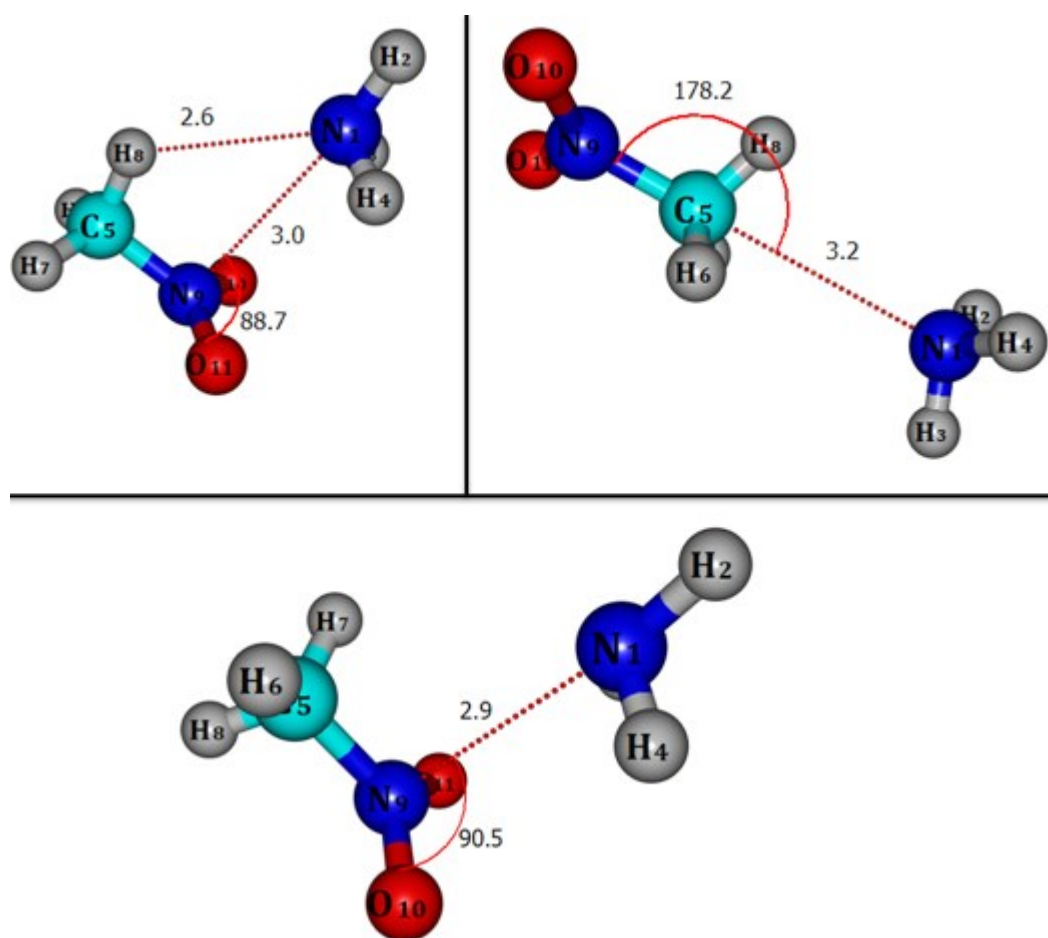

**Figure S1.** Optimized geometries on PES of 1:1::NM:AM at MP2/aug-cc-pVTZ

Coordinates of 1:1::NM:AM geometries at MP2/aug-cc-pVTZ

NM-AM I

|   |              |              |              |
|---|--------------|--------------|--------------|
| 7 | -2.217564000 | 0.198826000  | -0.000419000 |
| 1 | -3.189627000 | 0.482105000  | -0.000151000 |
| 1 | -2.086255000 | -0.395099000 | 0.810557000  |
| 1 | -2.086946000 | -0.395890000 | -0.810924000 |
| 6 | 0.911746000  | 1.269572000  | -0.000287000 |
| 1 | 1.449897000  | 1.532464000  | 0.902526000  |
| 1 | 1.450311000  | 1.531864000  | -0.903026000 |
| 1 | -0.088964000 | 1.694525000  | -0.000649000 |
| 7 | 0.707133000  | -0.197375000 | 0.000159000  |
| 8 | 0.602908000  | -0.754438000 | 1.091296000  |
| 8 | 0.603858000  | -0.755257000 | -1.090645000 |

NM-AM II

|   |              |              |              |
|---|--------------|--------------|--------------|
| 7 | -3.444076000 | -0.001852000 | 0.000010000  |
| 1 | -3.836177000 | -0.465723000 | 0.810667000  |
| 1 | -3.832434000 | -0.469127000 | -0.810497000 |
| 1 | -3.824759000 | 0.936863000  | -0.002832000 |
| 6 | -0.205885000 | -0.032026000 | 0.000593000  |
| 1 | -0.545053000 | 0.494670000  | -0.884075000 |
| 1 | -0.527785000 | -1.064227000 | 0.001385000  |
| 1 | -0.544521000 | 0.495993000  | 0.884665000  |
| 7 | 1.278461000  | -0.000214000 | 0.000045000  |
| 8 | 1.808671000  | 1.108908000  | -0.000195000 |
| 8 | 1.879497000  | -1.074137000 | -0.000212000 |

NM-AM \*

|   |              |              |              |
|---|--------------|--------------|--------------|
| 7 | 2.192786000  | 0.179112000  | -0.001041000 |
| 1 | 3.163838000  | 0.465999000  | 0.009894000  |
| 1 | 2.073117000  | -0.411345000 | -0.816414000 |
| 1 | 2.057673000  | -0.421162000 | 0.804728000  |
| 6 | -0.868797000 | 1.280713000  | -0.000017000 |
| 1 | -0.409629000 | 1.671225000  | 0.898737000  |
| 1 | -0.406710000 | 1.671031000  | -0.897372000 |
| 1 | -1.941361000 | 1.457684000  | -0.001875000 |
| 7 | -0.679760000 | -0.189123000 | 0.000335000  |
| 8 | -0.618165000 | -0.752623000 | 1.091229000  |
| 8 | -0.621251000 | -0.753331000 | -1.090310000 |

**Table S6.** Relative and binding energies (all in kcal mol<sup>-1</sup>), of NM-AM I and II, inclusive of zero point energies at MP2/aug-cc-pVTZ level.

| <b>Heterodimer</b> | <b>Relative Energy</b> | <b>ZPE Corr Binding Energy</b> |
|--------------------|------------------------|--------------------------------|
| <b>NM-AM I</b>     | 0                      | -4.34                          |
| <b>NM-AM II</b>    | 1.18                   | -2.16                          |



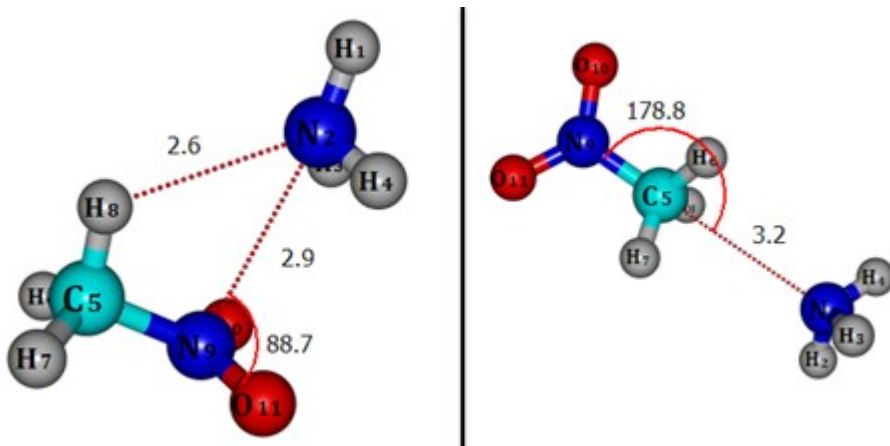

**Figure S2.** Optimized geometries of minima on PES of 1:1::NM:AM at MP4/aug-cc-pVDZ

Coordinates of 1:1::NM:AM geometries at MP4/aug-cc-pVDZ

NM-AM I

|   |              |              |              |
|---|--------------|--------------|--------------|
| 1 | -3.176771000 | 0.494547000  | 0.079212000  |
| 7 | -2.193585000 | 0.222177000  | -0.004158000 |
| 1 | -2.012368000 | -0.419721000 | 0.773576000  |
| 1 | -2.130121000 | -0.351858000 | -0.850178000 |
| 6 | 0.930328000  | 1.280031000  | -0.002496000 |
| 1 | 1.478661000  | 1.527160000  | 0.916846000  |
| 1 | 1.491249000  | 1.533399000  | -0.912598000 |
| 1 | -0.076072000 | 1.727554000  | -0.010299000 |
| 7 | 0.697513000  | -0.205636000 | 0.000933000  |
| 8 | 0.577915000  | -0.765688000 | 1.106531000  |
| 8 | 0.586580000  | -0.772694000 | -1.101408000 |

NM-AM II

|   |              |              |              |
|---|--------------|--------------|--------------|
| 7 | -3.393937000 | -0.001928000 | 0.007259000  |
| 1 | -3.797402000 | -0.719674000 | 0.615958000  |
| 1 | -3.802667000 | -0.165683000 | -0.916938000 |
| 1 | -3.791277000 | 0.885069000  | 0.328882000  |
| 6 | -0.238172000 | -0.009833000 | -0.022981000 |
| 1 | -0.572835000 | 0.803028000  | -0.679941000 |
| 1 | -0.571371000 | -0.996604000 | -0.365862000 |
| 1 | -0.569873000 | 0.180008000  | 1.008176000  |
| 7 | 1.267813000  | -0.000937000 | -0.009194000 |
| 8 | 1.825225000  | 1.112879000  | 0.009956000  |
| 8 | 1.851940000  | -1.101265000 | 0.010189000  |

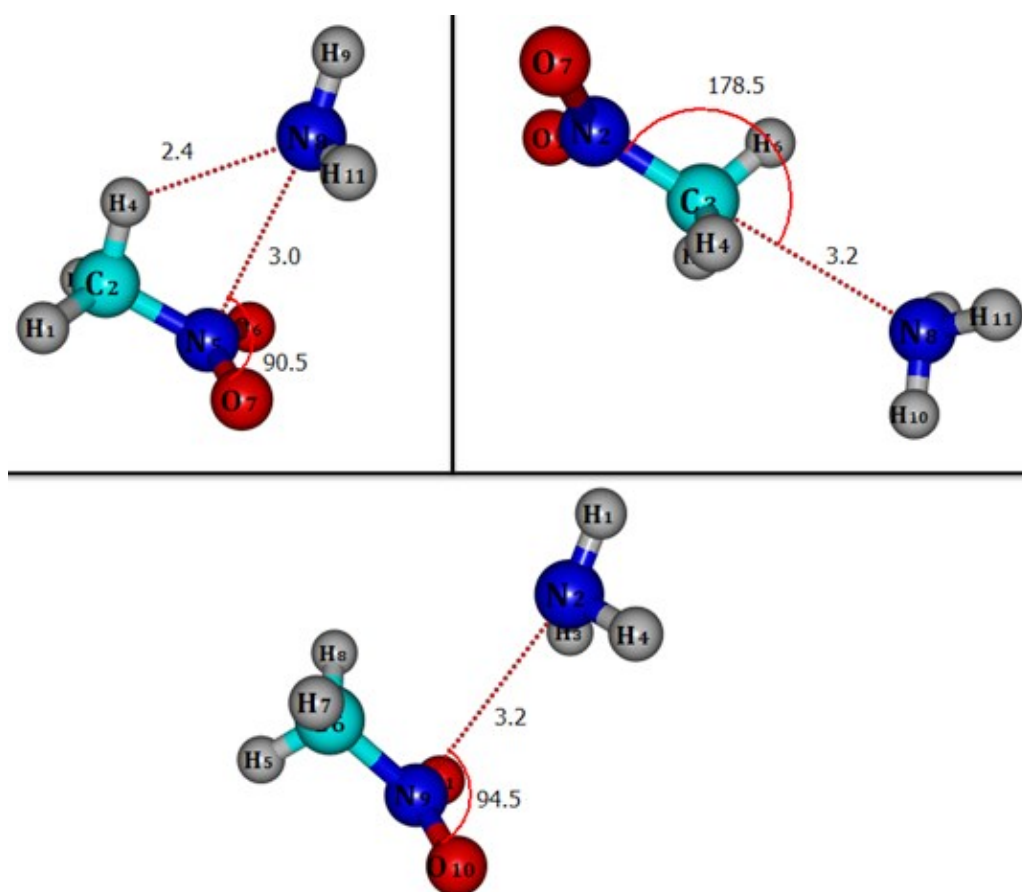

**Figure S3.** Optimized geometries on PES of 1:1::NM:AM at CCSD/aug-cc-pVDZ

Coordinates of 1:1::NM:AM geometries at CCSD/aug-cc-pVDZ

NM-AM I

|   |              |              |              |
|---|--------------|--------------|--------------|
| 7 | 2.253269000  | 0.168730000  | 0.000013000  |
| 1 | 3.233359000  | 0.454636000  | -0.000466000 |
| 1 | 2.132802000  | -0.437296000 | -0.814334000 |
| 1 | 2.133479000  | -0.436880000 | 0.814769000  |
| 6 | -0.874324000 | 1.295572000  | 0.000007000  |
| 1 | -1.410216000 | 1.575732000  | -0.914464000 |
| 1 | -1.410299000 | 1.575707000  | 0.914437000  |
| 1 | 0.153884000  | 1.684606000  | 0.000060000  |
| 7 | -0.722643000 | -0.192489000 | -0.000003000 |
| 8 | -0.643828000 | -0.751468000 | -1.088208000 |
| 8 | -0.643853000 | -0.751484000 | 1.088193000  |

NM-AM II

|   |              |              |              |
|---|--------------|--------------|--------------|
| 7 | -3.404002000 | -0.000921000 | 0.009999000  |
| 1 | -3.802595000 | -0.718085000 | 0.619099000  |
| 1 | -3.807243000 | -0.166709000 | -0.914172000 |
| 1 | -3.798551000 | 0.885788000  | 0.329826000  |
| 6 | -0.225874000 | -0.014681000 | -0.030386000 |
| 1 | -0.560709000 | 0.796330000  | -0.686080000 |
| 1 | -0.554471000 | -1.000017000 | -0.374693000 |
| 1 | -0.563013000 | 0.172905000  | 0.997511000  |
| 7 | 1.272190000  | -0.000474000 | -0.008695000 |
| 8 | 1.819040000  | 1.097239000  | 0.012315000  |
| 8 | 1.851523000  | -1.081285000 | 0.012897000  |

NM-AM \*

|   |              |              |              |
|---|--------------|--------------|--------------|
| 1 | -3.369819000 | 0.211641000  | 0.249057000  |
| 7 | -2.411137000 | -0.022588000 | -0.029822000 |
| 1 | -2.018831000 | -0.623669000 | 0.702515000  |
| 1 | -2.526350000 | -0.647981000 | -0.837806000 |
| 1 | 1.596950000  | 1.760438000  | 0.119834000  |
| 6 | 0.579449000  | 1.386036000  | -0.034326000 |
| 1 | 0.173924000  | 1.802833000  | -0.972965000 |
| 1 | 0.067873000  | 1.704727000  | 0.882217000  |
| 7 | 0.810995000  | -0.146819000 | -0.000332000 |
| 8 | 0.894422000  | -0.728955000 | -1.079832000 |
| 8 | 0.830646000  | -0.688339000 | 1.114105000  |

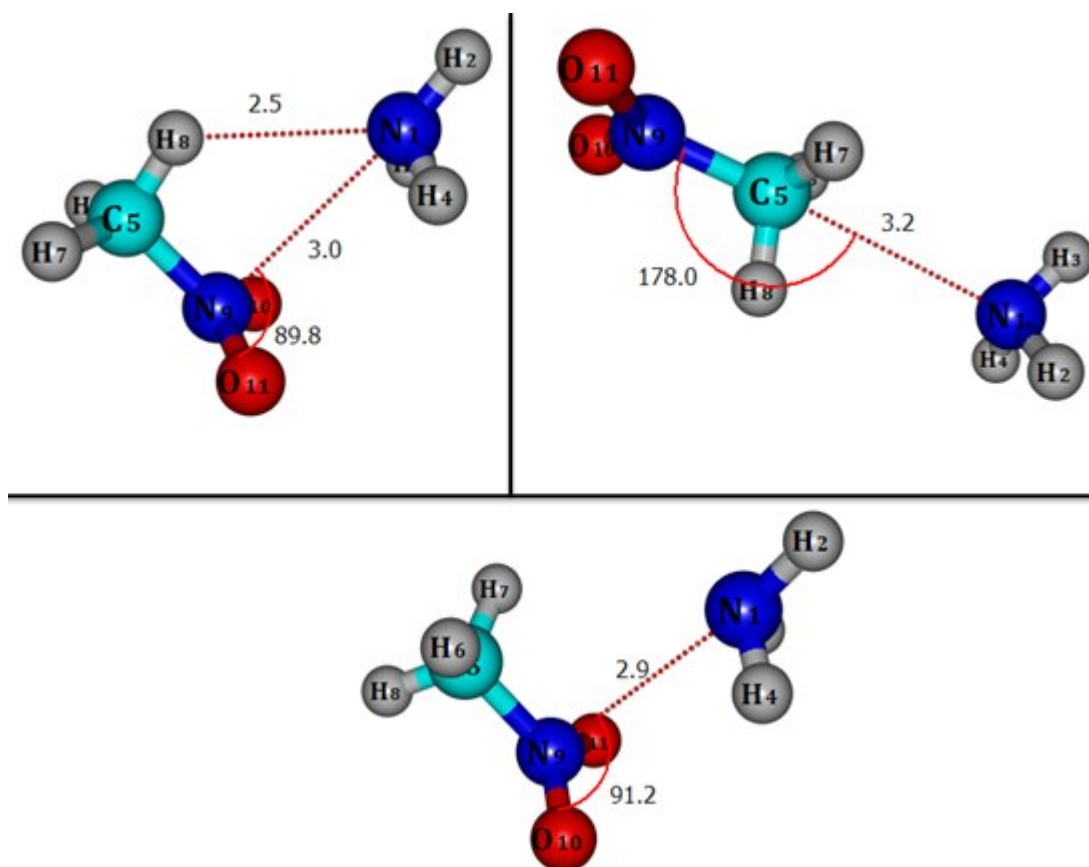

**Figure S4.** Optimized geometries on PES of 1:1::NM:AM at B3LYP-GD3/aug-cc-pVDZ

Coordinates of 1:1::NM:AM geometries at B3LYP-GD3/aug-cc-pVDZ

NM-AM I

|   |              |              |              |
|---|--------------|--------------|--------------|
| 7 | -2.253962000 | 0.147318000  | -0.000217000 |
| 1 | -3.242956000 | 0.386583000  | 0.000253000  |
| 1 | -2.091660000 | -0.442797000 | 0.814476000  |
| 1 | -2.092422000 | -0.442704000 | -0.815126000 |
| 6 | 0.835679000  | 1.307235000  | -0.000066000 |
| 1 | 1.355987000  | 1.607620000  | 0.912097000  |
| 1 | 1.356204000  | 1.607438000  | -0.912162000 |
| 1 | -0.203970000 | 1.656525000  | -0.000214000 |
| 7 | 0.727933000  | -0.184553000 | 0.000076000  |
| 8 | 0.661353000  | -0.747078000 | 1.087528000  |
| 8 | 0.662015000  | -0.747350000 | -1.087271000 |

NM-AM II

|   |              |              |              |
|---|--------------|--------------|--------------|
| 7 | -3.398877000 | -0.000812000 | 0.011239000  |
| 1 | -3.787397000 | -0.714410000 | 0.625935000  |
| 1 | -3.793708000 | -0.172763000 | -0.912088000 |
| 1 | -3.783333000 | 0.888716000  | 0.325811000  |
| 6 | -0.230262000 | -0.016873000 | -0.034475000 |
| 1 | -0.566318000 | 0.788892000  | -0.689198000 |
| 1 | -0.560527000 | -1.000003000 | -0.369774000 |
| 1 | -0.567631000 | 0.176807000  | 0.988124000  |
| 7 | 1.269481000  | -0.000479000 | -0.008550000 |
| 8 | 1.816168000  | 1.097313000  | 0.013348000  |
| 8 | 1.852115000  | -1.079434000 | 0.014054000  |

NM-AM \*

|   |              |              |              |
|---|--------------|--------------|--------------|
| 7 | 2.212562000  | 0.151020000  | -0.000114000 |
| 1 | 3.194130000  | 0.419599000  | 0.017374000  |
| 1 | 2.081337000  | -0.433855000 | -0.824166000 |
| 1 | 2.057661000  | -0.453728000 | 0.805327000  |
| 6 | -0.827834000 | 1.305294000  | 0.000212000  |
| 1 | -0.352065000 | 1.681276000  | 0.906830000  |
| 1 | -0.351617000 | 1.681502000  | -0.906076000 |
| 1 | -1.904124000 | 1.513696000  | -0.000076000 |
| 7 | -0.690280000 | -0.185052000 | 0.000031000  |
| 8 | -0.650529000 | -0.750233000 | 1.087156000  |
| 8 | -0.651258000 | -0.750021000 | -1.087144000 |

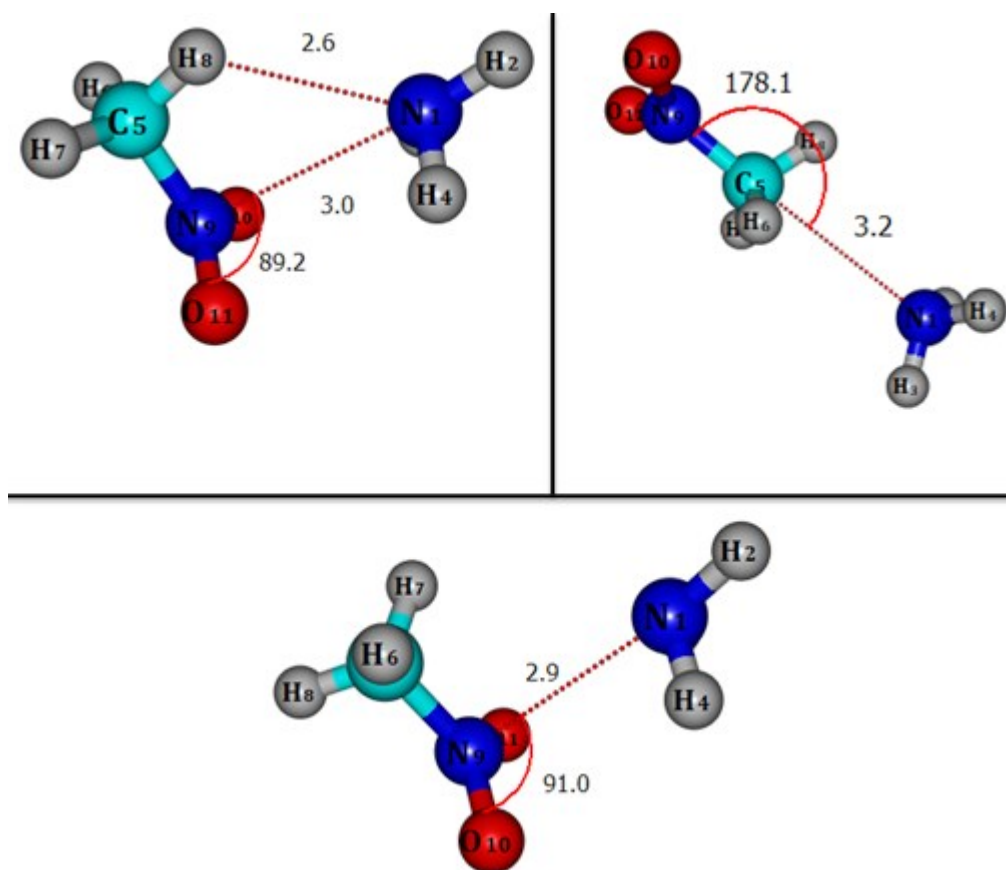

**Figure S5.** Optimized geometries on PES of 1:1::NM:AM at B2PLYP-GD3/aug-cc-pVDZ

Coordinates of 1:1::NM:AM geometries at B2PLYP-GD3/aug-cc-pVDZ

NM-AM I

|   |              |              |              |
|---|--------------|--------------|--------------|
| 7 | -2.225563000 | 0.181312000  | -0.000133000 |
| 1 | -3.211864000 | 0.430885000  | -0.000046000 |
| 1 | -2.074876000 | -0.413088000 | 0.813516000  |
| 1 | -2.075077000 | -0.413309000 | -0.813657000 |
| 6 | 0.879485000  | 1.290695000  | -0.000016000 |
| 1 | 1.413165000  | 1.568010000  | 0.911352000  |
| 1 | 1.413277000  | 1.567927000  | -0.911344000 |
| 1 | -0.143411000 | 1.683358000  | -0.000094000 |
| 7 | 0.713512000  | -0.193016000 | 0.000042000  |
| 8 | 0.623924000  | -0.755304000 | 1.093524000  |
| 8 | 0.624354000  | -0.755449000 | -1.093398000 |

NM-AM II

|   |              |              |              |
|---|--------------|--------------|--------------|
| 7 | -3.399602000 | -0.001027000 | 0.010633000  |
| 1 | -3.794344000 | -0.715277000 | 0.620402000  |
| 1 | -3.799879000 | -0.168568000 | -0.911033000 |
| 1 | -3.790355000 | 0.884631000  | 0.328000000  |
| 6 | -0.228478000 | -0.015550000 | -0.032372000 |
| 1 | -0.563766000 | 0.791332000  | -0.685322000 |
| 1 | -0.557526000 | -0.997319000 | -0.371798000 |
| 1 | -0.564999000 | 0.173838000  | 0.990533000  |
| 7 | 1.267613000  | -0.000453000 | -0.009187000 |
| 8 | 1.818069000  | 1.103106000  | 0.013024000  |
| 8 | 1.852639000  | -1.086227000 | 0.013642000  |

NM-AM \*

|   |              |              |              |
|---|--------------|--------------|--------------|
| 7 | 2.192580000  | 0.160212000  | -0.000305000 |
| 1 | 3.169532000  | 0.444766000  | 0.012798000  |
| 1 | 2.073292000  | -0.432638000 | -0.820273000 |
| 1 | 2.055185000  | -0.445729000 | 0.807204000  |
| 6 | -0.837139000 | 1.300157000  | -0.000051000 |
| 1 | -0.364495000 | 1.680014000  | 0.906246000  |
| 1 | -0.363878000 | 1.679882000  | -0.906081000 |
| 1 | -1.914702000 | 1.498149000  | -0.000461000 |
| 7 | -0.683020000 | -0.185529000 | 0.000071000  |
| 8 | -0.637025000 | -0.752883000 | 1.093411000  |
| 8 | -0.637853000 | -0.753139000 | -1.093097000 |



## S2 Relevant delocalisations from NBO analysis

**Table S7.** Second order perturbation energies ( $E_2$ , in kcal mol<sup>-1</sup>) associated with characteristic intermolecular NBO delocalisations in NAM I along with their respective occupancies.

| Donor           | Acceptor          | $E_2$ | Occupancy <sup>a</sup> |                  |
|-----------------|-------------------|-------|------------------------|------------------|
|                 |                   |       | Donor                  | Acceptor         |
| lp(N1)          | $\sigma^*(C5-H8)$ | 2.14  | 1.99175(1.99530)       | 0.00613(0.00446) |
|                 | $\sigma^*(C5-N9)$ | 0.13  |                        | 0.04907(0.05057) |
|                 | $\pi^*(N9-O11)$   |       |                        | 0.33             |
| $\sigma(N1-H3)$ |                   | 0.06  |                        |                  |
| $\pi(N9-O11)$   | $\sigma^*(N1-H2)$ | 0.11  | 1.99396(1.99274)       | 0.00024(0.00001) |
|                 | $\sigma^*(N1-H4)$ | 0.15  |                        | 0.00041(0.00001) |
| lp(O10)         | $\sigma^*(N1-H3)$ | 0.22  | 1.50878(1.50774)       | 0.00042(0.00001) |

<sup>a</sup>Occupancy of NBO in the monomer shown within parenthesis

**Table S8.** Second order perturbation energies ( $E_2$ , in kcal mol<sup>-1</sup>) associated with characteristic intermolecular NBO delocalisations in NAM\* along with their respective occupancies.

| Donor           | Acceptor          | $E_2$ | Occupancy <sup>a</sup> |                  |
|-----------------|-------------------|-------|------------------------|------------------|
|                 |                   |       | Donor                  | Acceptor         |
| lp(N1)          | $\sigma^*(C5-H8)$ | 0.54  | 1.99286(1.99530)       | 0.00398(0.00446) |
|                 | $\sigma^*(C5-N9)$ | 0.22  |                        | 0.04964(0.05057) |
|                 | $\pi^*(N9-O11)$   |       |                        | 0.55             |
| $\sigma(N1-H3)$ |                   | 0.1   |                        |                  |
| $\pi(N9-O11)$   | $\sigma^*(N1-H2)$ | 0.12  | 1.99334(1.99274)       | 0.00031(0.00001) |
|                 | $\sigma^*(N1-H4)$ | 0.13  |                        | 0.00041(0.00001) |
| lp(O10)         | $\sigma^*(N1-H3)$ | 0.21  | 1.50538(1.50774)       | 0.00036(0.00001) |

<sup>a</sup>Occupancy of NBO in the monomer shown within parenthesis

**Table S9.** Second order perturbation energies ( $E_2$ , in kcal mol<sup>-1</sup>) associated with characteristic intermolecular NBO delocalisations in N...N bonded 2:1::NH<sub>3</sub>:NMeth heterotrimer along with their respective occupancies.

| Donor             | Acceptor            | $E_2$ | Occupancy <sup>a</sup> |                  |
|-------------------|---------------------|-------|------------------------|------------------|
|                   |                     |       | Donor                  | Acceptor         |
| lp(N1)            | $\sigma^*(C5-H8)$   | 1.72  | 1.99237(1.99530)       | 0.00616(0.00446) |
|                   | $\sigma^*(C5-N9)$   | 0.11  |                        | 0.04831(0.05057) |
|                   | $\pi^*(N9-O11)$     | 0.35  |                        | 0.49776(0.50337) |
| $\sigma(N1-H3)$   | $\pi^*(N9-O11)$     | 0.08  | 1.99859(1.99928)       |                  |
| lp(N13)           | $\sigma^*(C5-H8)$   | 0.41  | 1.99318(1.99530)       | 0.00616(0.00446) |
|                   | $\sigma^*(C5-N9)$   | 0.19  |                        | 0.04831(0.05057) |
|                   | $\pi^*(N9-O11)$     | 0.56  |                        | 0.49776(0.50337) |
| $\sigma(N13-H14)$ | $\pi^*(N9-O11)$     | 0.11  | 1.99844(1.99928)       |                  |
| $\pi(N9-O11)$     | $\sigma^*(N1-H2)$   | 0.1   | 1.99325(1.99274)       | 0.00025(0.00001) |
|                   | $\sigma^*(N1-H4)$   | 0.15  |                        | 0.00047(0.00001) |
|                   | $\sigma^*(N13-H12)$ | 0.15  |                        | 0.00045(0.00001) |
|                   | $\sigma^*(N13-H15)$ | 0.11  |                        | 0.00031(0.00001) |
| lp(O10)           | $\sigma^*(N1-H3)$   | 0.24  | 1.51598(1.50774)       | 0.00050(0.00001) |
|                   | $\sigma^*(N13-H14)$ | 0.23  |                        | 0.00046(0.00001) |

<sup>a</sup>Occupancy of NBO in the monomer shown within parenthesis

### S3 Nitromethane – H<sub>2</sub>O experiments

**Table S10.** Assignment of modes of vibration to new features observed in NMeth-H<sub>2</sub>O co-deposition experiments

| Computed Wavenumber (cm <sup>-1</sup> ) |             | Experimental Wavenumber (cm <sup>-1</sup> ) |             |                              |             | Mode Assignment                                      |
|-----------------------------------------|-------------|---------------------------------------------|-------------|------------------------------|-------------|------------------------------------------------------|
| $\nu$                                   | $\Delta\nu$ | Ar                                          |             | N <sub>2</sub>               |             |                                                      |
|                                         |             | $\nu$                                       | $\Delta\nu$ | $\nu$                        | $\Delta\nu$ |                                                      |
| <b>O-H Stretching</b>                   |             |                                             |             |                              |             |                                                      |
| 3938.3 (67)                             | ---         | 3756.4                                      | ---         | 3727.4                       | ---         | $\nu_3$ of H <sub>2</sub> O monomer <sup>[3]</sup>   |
| 3904.3 (139)                            | -38.0       | 3715.1                                      | -41.3       | 3715.6/<br>3706.2/<br>3700.0 | -20.1       | Anti-symmetric O-H stretch in NMeth-H <sub>2</sub> O |
| <b>O=N=O Stretching</b>                 |             |                                             |             |                              |             |                                                      |
| 1760.5(156)                             | ---         | 1570.1                                      | ---         | 1572.7                       | ---         | $\nu_3$ of NMeth monomer <sup>[1,2]</sup>            |
| 1748.6 (174)                            | -11.9       | 1564.1                                      | -6.0        | 1568.4/<br>1564.3            | -6.4        | O=N=O stretch in NMeth-H <sub>2</sub> O              |

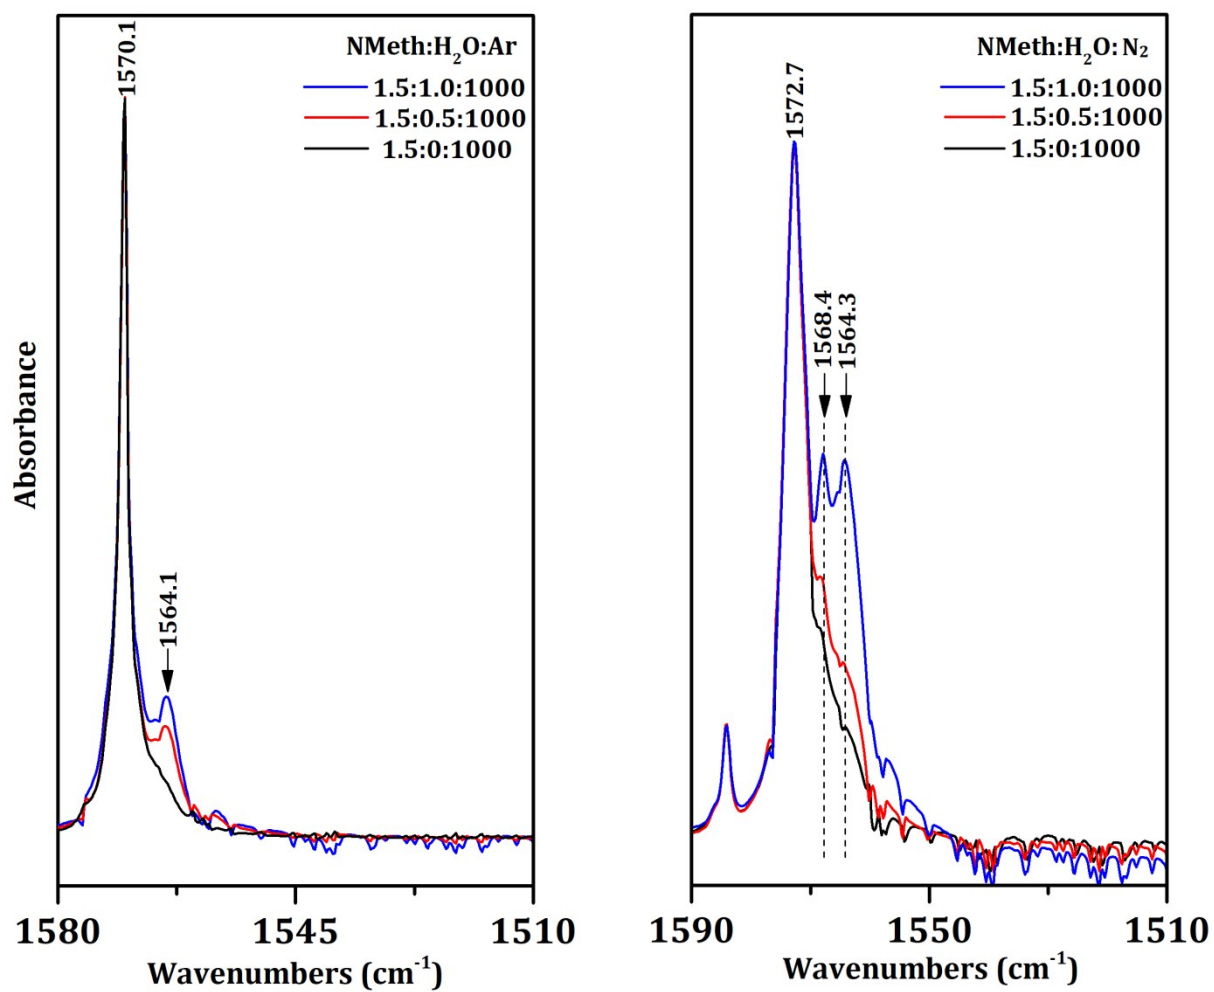

**Figure S6.** Infrared spectra of O=N=O stretching region of NMeth corresponding to the co-deposition experiments of H<sub>2</sub>O and NMeth in Ar and N<sub>2</sub> matrix. All spectra were recorded at 12 K following a 15 minute annealing, at 35 K (Ar); at 32 K (N<sub>2</sub>).

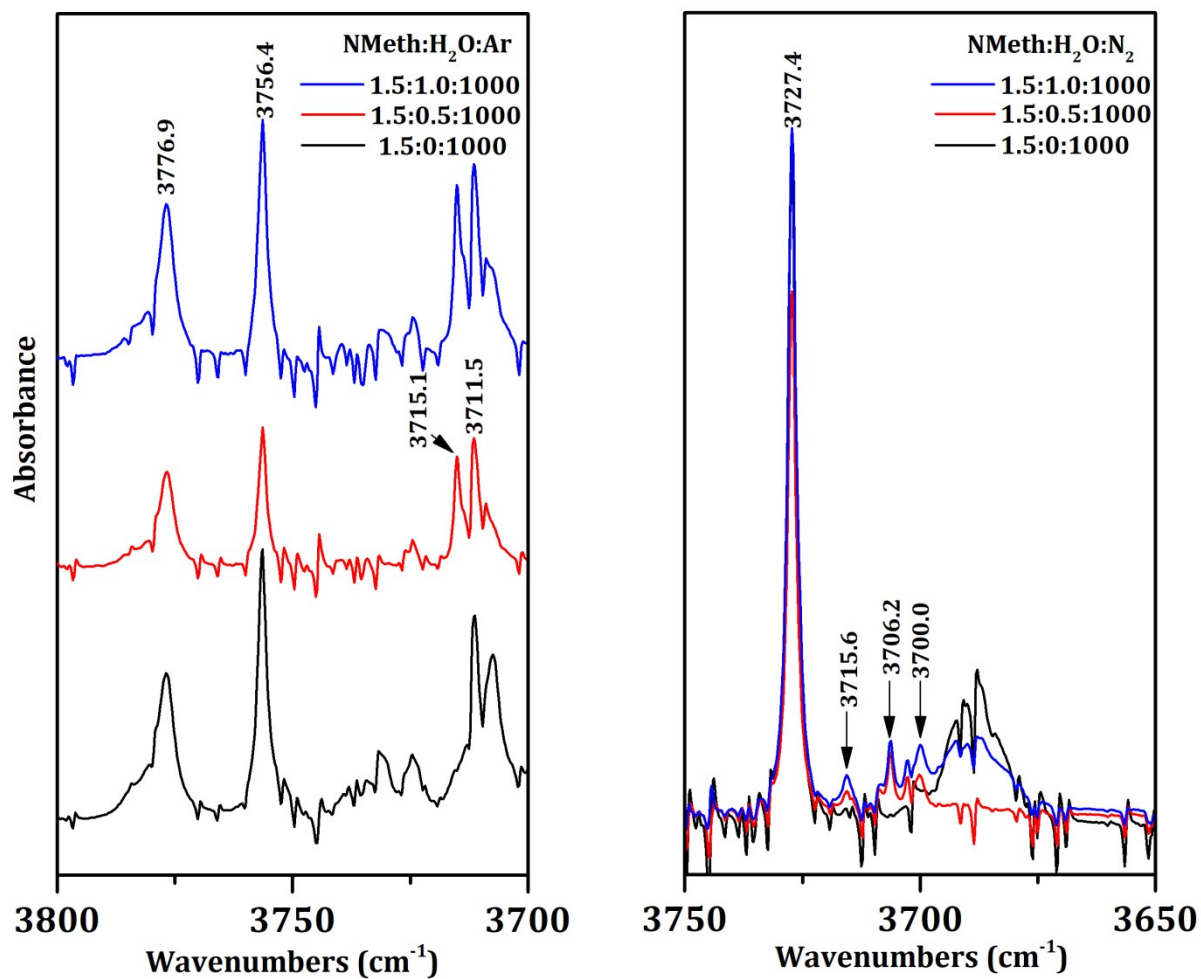

**Figure S7.** Infrared spectra of O-H stretching region of H<sub>2</sub>O corresponding to the co-deposition experiments of H<sub>2</sub>O and NMeth in Ar and N<sub>2</sub> matrix. All spectra were recorded at 12 K following a 15 minute annealing, at 35 K (Ar); at 32 K (N<sub>2</sub>).

S4 Minima on the PES of NMeth:NH<sub>3</sub> heterotrimers

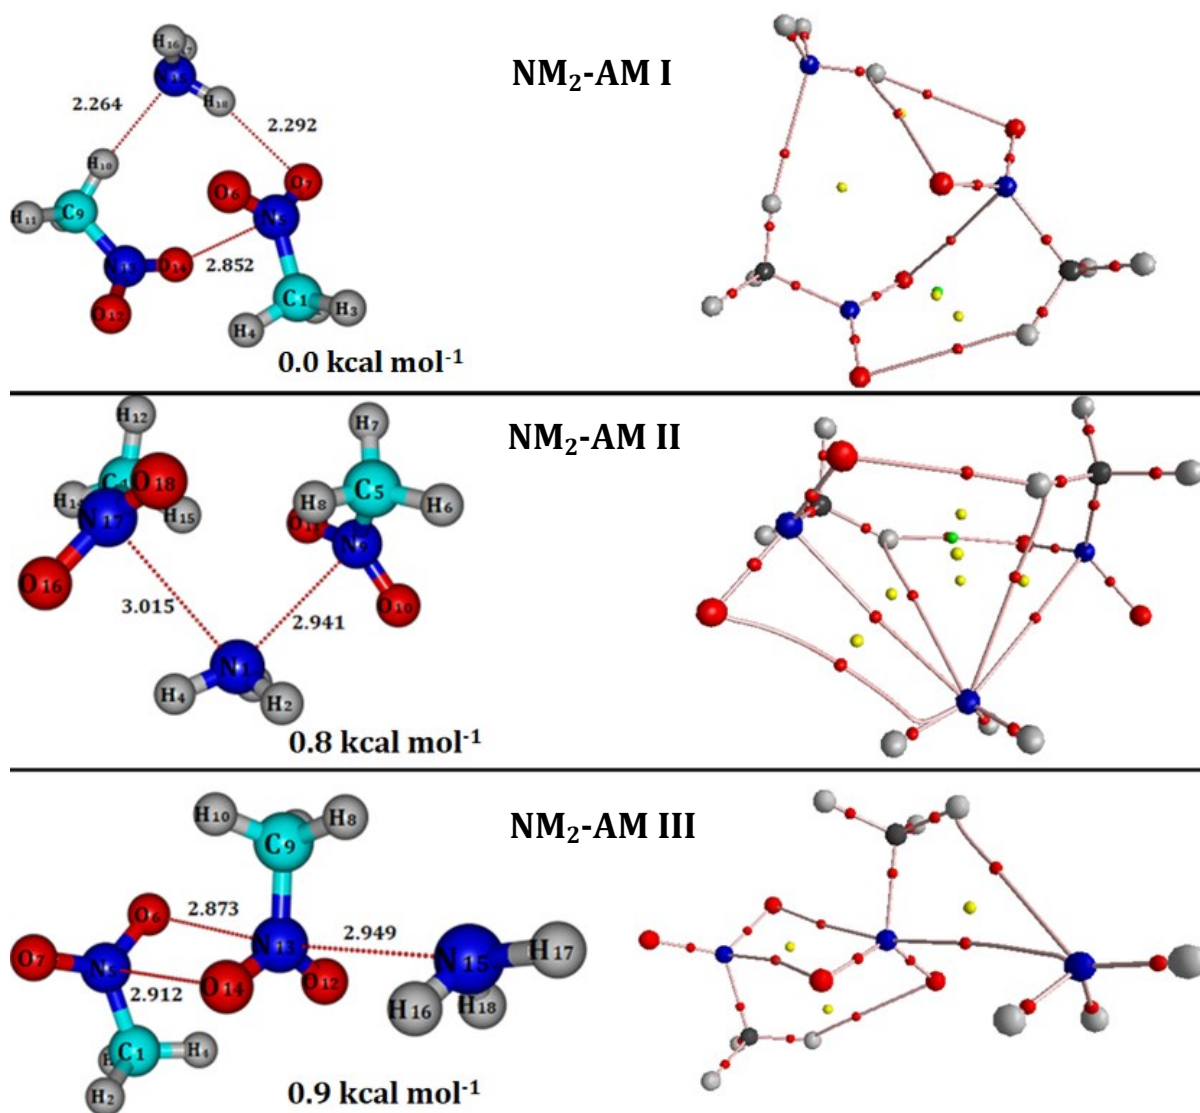

**Figure S8.** Optimized geometries corresponding to energetic minima on the PES of 2:1::NM:AM heterotrimer, with the respective energies relative to the global minimum.

**Table S11.** BSSE/ZPE (all in kcal mol<sup>-1</sup>) corrected binding energies for 2:1::NM:AM heterotrimers

| Heterotrimer            | ZPE corrected | BSSE corrected |
|-------------------------|---------------|----------------|
| NM <sub>2</sub> -AM I   | -12.6         | -15.4          |
| NM <sub>2</sub> -AM II  | -11.8         | -14.2          |
| NM <sub>2</sub> -AM III | -11.7         | -14.1          |

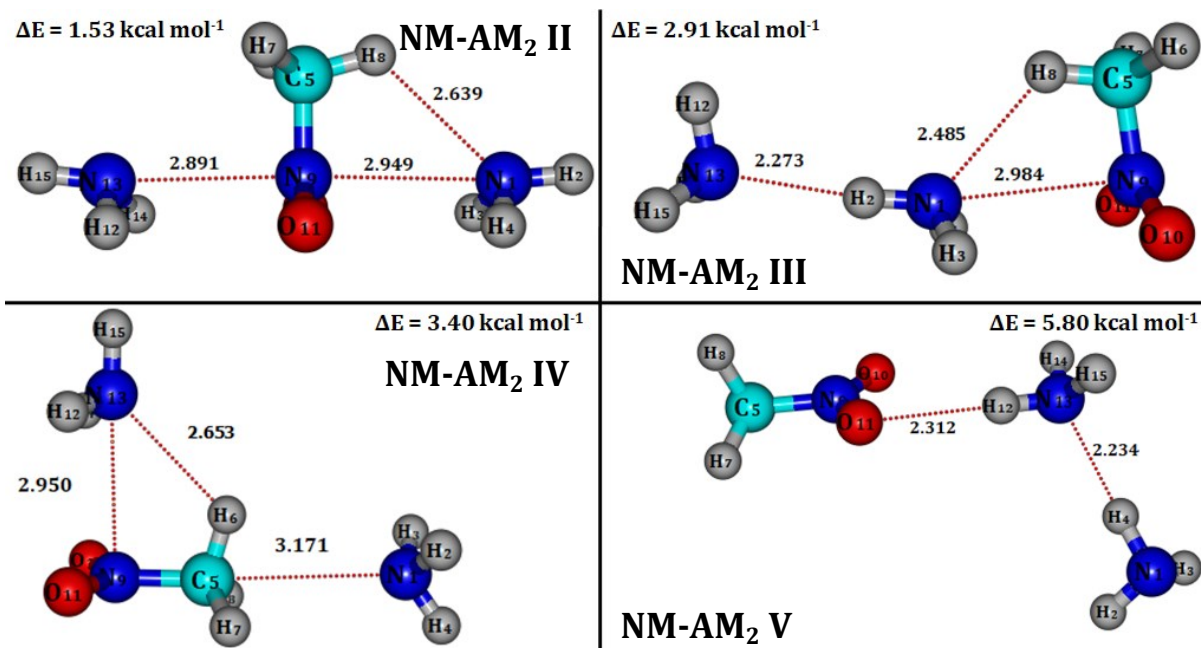

**Figure S9.** Optimized geometries corresponding to local minima on the PES of 1:2::NM:AM heterotrimer, with the respective energies relative to the global minimum.

**Table S12.** BSSE/ZPE (all in kcal mol<sup>-1</sup>) corrected binding energies for 1:2::NM:AM heterotrimers

| Heterotrimer           | ZPE corrected | BSSE corrected |
|------------------------|---------------|----------------|
| NM-AM <sub>2</sub> I   | -10.3         | -13.8          |
| NM-AM <sub>2</sub> II  | -8.8          | -11.5          |
| NM-AM <sub>2</sub> III | -7.4          | -10.2          |
| NM-AM <sub>2</sub> IV  | -6.9          | -9.1           |
| NM-AM <sub>2</sub> V   | -4.5          | -6.8           |

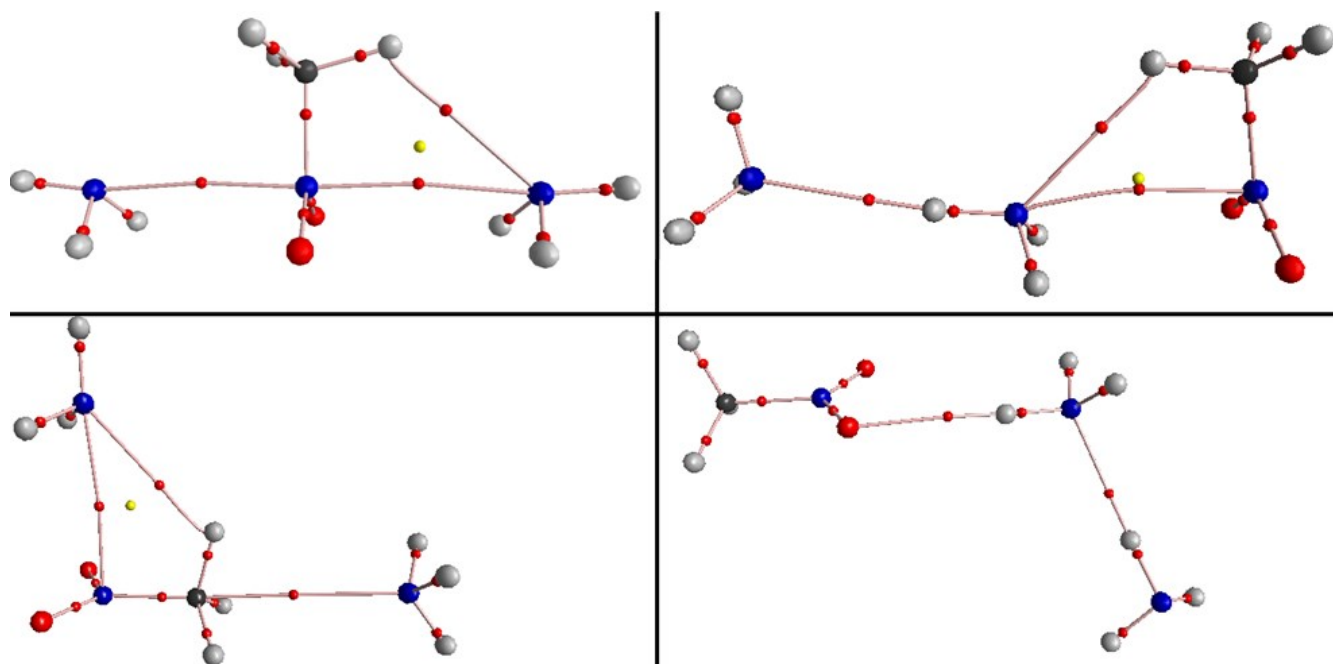

**Figure S10.** QTAIM plots of local minima on the PES of 1:2::NM:AM heterotrimers with BCPs in red and RCPs in yellow.

## References:

- [1] F. D. Verderame, J. A. Lannon, L. E. Harris, W. G. Thomas, E. A. Lucia, *J. Chem. Phys.* **1972**, *56*, 2638–2648.
- [2] H. W. Brown, G. C. Pimentel, *J. Chem. Phys.* **1958**, *29*, 883–888.
- [3] G. P. Ayers, A. D. E. Pullin, *Spectrochim. Acta Part A Mol. Spectrosc.* **1976**, *32*, 1629–1639.
- [4] M. J. Frisch, G. W. Trucks, H. B. Schlegel, G. E. Scuseria, M. A. Robb, J. R. Cheeseman, G. Scalmani, V. Barone, B. Mennucci, G. A. Petersson, H. Nakatsuji, M. Caricato, X. Li, H. P. Hratchian, A. F. Izmaylov, J. Bloino, G. Zheng, J. L. Sonnenberg, M. Hada, M. Ehara, K. Toyota, R. Fukuda, J. Hasegawa, M. Ishida, T. Nakajima, Y. Honda, O. Kitao, H. Nakai, T. Vreven, J. A. Montgomery, Jr., J. E. Peralta, F. Ogliaro, M. Bearpark, J. J. Heyd, E. Brothers, K. N. Kudin, V. N. Staroverov, R. Kobayashi, J. Normand, K. Raghavachari, A. Rendell, J. C. Burant, S. S. Iyengar, J. Tomasi, M. Cossi, N. Rega, J. M. Millam, M. Klene, J. E. Knox, J. B. Cross, V. Bakken, C. Adamo, J. Jaramillo, R. Gomperts, R. E. Stratmann, O. Yazyev, A. J. Austin, R. Cammi, C. Pomelli, J. W. Ochterski, R. L. Martin, K. Morokuma, V. G. Zakrzewski, G. A. Voth, P. Salvador, J. J. Dannenberg, S. Dapprich, A. D. Daniels, O. Farkas, J. B. Foresman, J. V. Ortiz, J. Cioslowski and D. J. Fox, Gaussian 09, Revision D.01, Gaussian Inc., Wallingford CT, 2009.
- [5] T. Lu, F. Chen, *J. Comput. Chem.* **2012**, *33*, 580–592.
- [6] W. Humphrey, A. Dalke, K. Schulten, *J. Mol. Graph.* **1996**, *14*, 33–38.
